# Supplementary material for: The cost-effectiveness of prostate cancer screening using the Stockholm3 test
Source: PubMed Central journal article supplement (PMC7906342; doi:10.1371/journal.pone.0246674), 2021-02-25
Supplement: pone.0246674.s001.pdf [file pone.0246674.s001.pdf]

---

# The cost-effectiveness of prostate cancer screening using the Stockholm3 test

Andreas Karlsson<sup>1,2</sup>, Shuang Hao<sup>1,2</sup>, Alexandra Jauhiainen<sup>3</sup>, K Miriam Elfström<sup>4</sup>, Lars Egevad<sup>5</sup>, Tobias Nordström<sup>1,6</sup>, Emelie Heintz<sup>7</sup>, Mark Clements<sup>1,2\*</sup>

**1** Department of Medical Epidemiology and Biostatistics, Karolinska Institutet, Stockholm, Sweden

**2** Swedish eScience Research Centre, Sweden

**3** BioPharma Early Biometrics and Statistical Innovation, Data Science & AI, BioPharmaceuticals R&D, AstraZeneca, Gothenburg, Sweden

**4** Department of Laboratory Medicine, Karolinska University Hospital, SE-141 86, Stockholm, Sweden

**5** The Department of Oncology-Pathology, Karolinska University Hospital, Z1:00, SE-171 76, Stockholm, Sweden

**6** Department of Clinical Sciences, Danderyd Hospital, SE-182 88 Stockholm, Sweden

**7** Department of Learning, Informatics, Management and Ethics, Karolinska Institutet, PO Box 281, SE-171 77, Stockholm, Sweden

\* mark.clements@ki.se

## Supplementary Material

### Means costs and QALYs

Mathematically, the mean costs ( $\text{Cost}_k$ ) and QALYs ( $\text{QALY}_k$ ) for intervention  $k$  were calculated by

$$\text{Cost}_k = \sum_{i=1}^n \frac{1}{n} \int_0^{\infty} \frac{dC_{ik}(t)}{(1+\delta)^t}, \quad \text{QALY}_k = \sum_{i=1}^n \frac{1}{n} \int_0^{\infty} \frac{dV_{ik}(t)}{(1+\delta)^t}$$

where  $i$  was an index over the simulated individuals,  $dC_{ik}(t)$  and  $dV_{ik}(t)$  were the cumulative costs and HSVs, respectively, for individual  $i$  under intervention  $k$  at time  $t$ , and  $\delta$  was the discount rate (e.g. 3%). This formulation allowed for both discrete components (e.g. costs at a point in time) and continuous components (e.g. a fixed HSV over a defined period of time). The interventions were compared using the incremental costs and incremental QALYs.

### Number of biopsies for clinically detected prostate cancers

The simulation model did not explicitly model for biopsies for men who had symptoms but who did not have clinically detectable prostate cancer. These biopsies were modelled implicitly by the number of biopsies per man with clinically-detected prostate cancers.

This parameter has two components: (i) men with clinically detected prostate cancer may have had one or more previous negative biopsies; and (ii) men who had clinical symptoms with an associated negative biopsy but who were not clinically diagnosed with prostate cancer. However, limited data were available to calculate these components.

Using the Stockholm PSA and Biopsy Register, we extracted the number of men in Stockholm in 2012 diagnosed with prostate cancer with clinical symptoms; for those

| Category                          | Unit                              | Unit cost [€, 2019] |
|-----------------------------------|-----------------------------------|---------------------|
| PSA                               | Primary care (test sampling)      | 30                  |
|                                   | PSA analysis                      | 4                   |
| S3M                               | GP primary care                   | $0.2 \times 131$    |
|                                   | Primary care (test sampling)      | 30                  |
|                                   | PSA analysis                      | 4                   |
|                                   | S3M unit cost                     | 196                 |
| Biopsy                            | GP primary care                   | $0.2 \times 131$    |
|                                   | Prostate biopsy                   | 103                 |
| Assessment                        | Prostate pathology                | 300                 |
|                                   | Urology assessment                | 153                 |
| Prostatectomy                     | Surgery                           | 6806                |
|                                   | Radiation therapy                 | $0.25 \times 8508$  |
|                                   | Urology visit                     | $2 \times 153$      |
|                                   | Nurse visit                       | $2 \times 103$      |
| Radiation therapy                 | Radiation therapy                 | 8508                |
|                                   | Urology visit                     | $2 \times 153$      |
|                                   | Nurse visit                       | $2 \times 103$      |
| Active surveillance - yearly      | Urology visit                     | 153                 |
|                                   | PSA analysis                      | $2 \times 4$        |
|                                   | Biopsy                            | $0.5 \times 403$    |
| Active surveillance - single MR   | Used once for active surveillance | 263                 |
| Post-treatment follow-up - yearly | PSA test sampling                 | 30                  |
|                                   | PSA analysis                      | 4                   |
|                                   | Telefollow-up by urologist        | 40                  |
| Cancer death                      | Care for spread disease           | $3 \times 8521$     |
|                                   | Drugs for spread disease          | $3 \times 5785$     |

**S1 Table.** Detailed costs for prostate cancer testing, diagnosis, management and treatment, Sweden [1,2].

men, we found whether the men had any negative biopsies prior to their cancer diagnosis; we also assumed that a prostate cancer diagnosis had at least one biopsy. On average, these men had 1.24 biopsies at or before their prostate cancer diagnosis. We also extracted the number of men diagnosed with prostate cancer in 2012 and compared that number with the number of prostate biopsies for men not currently diagnosed with prostate cancer in 2012. This crude ratio was approximately 3 biopsies per prostate cancer diagnosis. Notably, these calculations are in the context of a population with moderate to high levels of PSA testing.

In summary, the number of biopsies associated with clinically detected prostate cancers is in the range of 1.24 to 3 biopsies per cancer. As an approximate estimate, we assumed 2 biopsies per clinically detected prostate cancer.

### Sensitivity Analysis

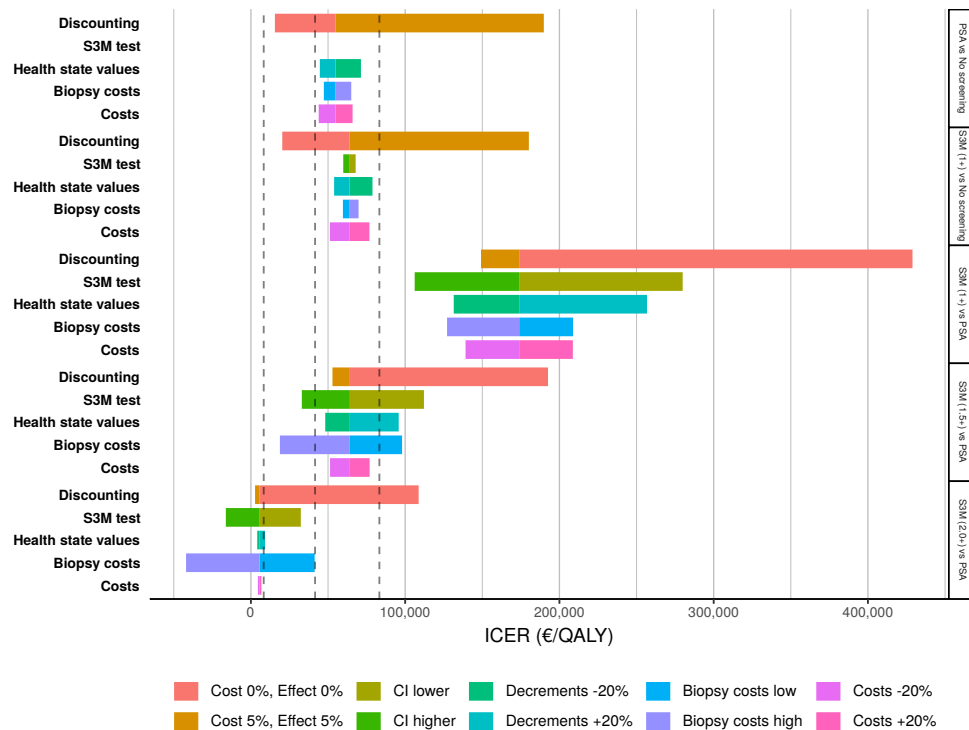

**S1 Fig.** One-way sensitivity analysis showing the effect of no and high discounting rates, the S3M test performance, high and low biopsy costs, 20% variation in all costs and HSV decrements on the cost-effectiveness. From the top the panels show the ICERs sensitivity for PSA screening compared with no screening, S3M screening compared with no screening, S3M screening compared with PSA screening as a reflex test at PSA 1, 1.5 and 2 ng/mL. From the left, the dashed lines show the limits for low (less than €8,300), moderate (€8,300–41,600), high (€41,600–83,300), and very high costs (over €83,300) for Sweden.

We performed a probabilistic sensitivity analysis quantifying the prediction uncertainty. Parameters from the natural history model were sampled using a multivariate normal distribution and covariance matrix from the model fit. All other parameters were assumed to be independent. The published confidence intervals from the published S3M test performance were sampled using a normal distribution. The costs for biopsies and urology assessments, which also indirectly affects the cost of active

surveillance, were handled separately, and sampled from a log-normal distribution €560 (95% CI 330-880). The other costs and the health state value decrements were sampled from triangular distributions with extremes  $\pm 20\%$ . The model was evaluated 500 times resulting in a distribution of outputs that can be graphed on the cost-effectiveness plane, and analysed. This may be represented using a cost-effectiveness acceptability curve.

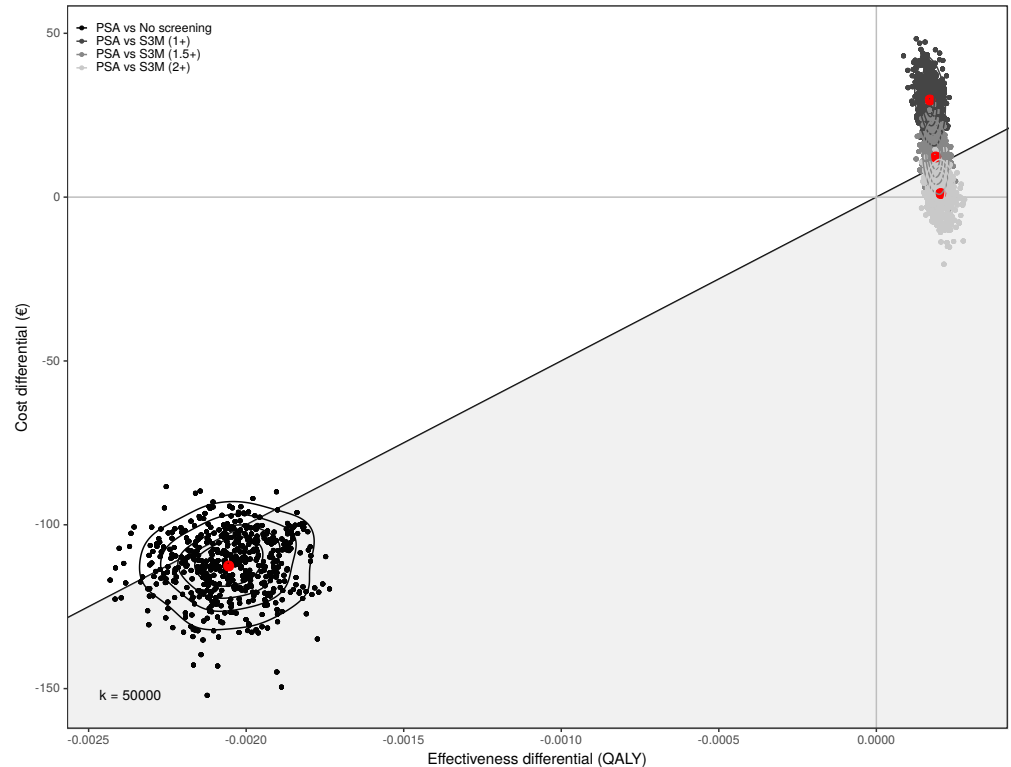

**S2 Fig.** Probabilistic sensitivity analysis for cost-effectiveness comparing no screening, PSA screening and S3M screening with reflex thresholds at 1 ng/mL, 1.5 ng/mL and 2 ng/mL. The effectiveness and costs are incremental relative to PSA screening and are discounted at 3% per annum. The red points show the distribution modes and the grey line shows a willingness to pay threshold at €50,000 per QALY.

The probabilistic sensitivity analysis represented on the cost-effectiveness plane comparing no screening, PSA screening and S3M screening with reflex thresholds at 1 ng/mL, 1.5 ng/mL and 2 ng/mL is shown in S2 Fig. The effectiveness and costs are incremental to PSA screening and discounted at 3% per annum. The cost reduction for no screening together with a 95% credible interval (CrI) was €112 (95% CrI 98–130). The cost increments for S3M screening with reflex thresholds at 1 ng/mL, 1.5 ng/mL and 2 ng/mL were €30 (95% CrI 19–41), €12 (95% CrI 3–21) and €1 (95% CrI -8–9), respectively.

The incremental reduction in effect for no screening was 0.0021 (95% CrI 0.0023–0.0018) QALYs relative to PSA screening. The effect increments for S3M screening with reflex thresholds at 1 ng/mL, 1.5 ng/mL and 2 ng/mL were 0.00017 (95% CrI 0.00013–0.00021), 0.00019 (95% CrI 0.00015–0.00022) and 0.00020 (95% CrI 0.00017–0.00024) QALYs, respectively.

---

## Health outcomes before and after age 70 years

Health outcomes were represented as life-time measures in S3 Table. To represent the effect of screening on these outcomes, we stratified the health outcomes for effects before and after age 70 (S2 and S3 Tables). In outline, we see a substantial increase in prostate cancer incidence due to screening, with lower incidence in the screening interventions after age 70. We also observe a large increase in prostate cancer mortality in the group above 70 years of age.

| Events before Age 70           | No screening | PSA   | S3M <sup>a</sup> | S3M <sup>b</sup> | S3M <sup>c</sup> | PSA-no screening | S3M <sup>a</sup> -PSA | S3M <sup>b</sup> -PSA | S3M <sup>c</sup> -PSA |
|--------------------------------|--------------|-------|------------------|------------------|------------------|------------------|-----------------------|-----------------------|-----------------------|
| <b>Outcomes per 10,000 men</b> |              |       |                  |                  |                  |                  |                       |                       |                       |
| Screening tests                | 0            | 35696 | 34875            | 34801            | 34732            | 35696            | -820                  | -895                  | -963                  |
| Biopsies                       | 523          | 6074  | 4046             | 3853             | 3663             | 5550             | -2028                 | -2221                 | -2410                 |
| Negative biopsies              | 256          | 5430  | 3423             | 3236             | 3054             | 5173             | -2006                 | -2194                 | -2376                 |
| Diagnosed cancers              | 267          | 645   | 623              | 618              | 610              | 378              | -22                   | -27                   | -35                   |
| Screen-detected cancers        | 0            | 525   | 502              | 497              | 488              | 525              | -23                   | -28                   | -37                   |
| Overdiagnosed cancers          | 0            | 118   | 107              | 104              | 100              | 118              | -11                   | -14                   | -18                   |
| Prostate cancer death          | 28           | 21    | 21               | 21               | 21               | -7               | 0                     | 0                     | 0                     |

**S2 Table.** Predicted effects before age 70 for no screening, PSA screening and S3M screening at 4-year intervals for the ages 55 to 69 years. The effects are presented as clinical events per 10,000 men and the four right most columns shows the differences between the scenarios.

<sup>a</sup> S3M as a reflex test between 1 and 10 ng/mL [3].

<sup>b</sup> S3M as a reflex test between 1.5 and 10 ng/mL as per clinical practice [2].

<sup>c</sup> S3M as a reflex test between 2 and 10 ng/mL.

| Events from Age 70<br>Outcomes per 10,000 men | No screening | PSA  | S3M <sup>a</sup> | S3M <sup>b</sup> | S3M <sup>c</sup> | PSA-no screening | S3M <sup>a</sup> -PSA | S3M <sup>b</sup> -PSA | S3M <sup>c</sup> -PSA |
|-----------------------------------------------|--------------|------|------------------|------------------|------------------|------------------|-----------------------|-----------------------|-----------------------|
| Screening tests                               | 0            | 108  | 68               | 64               | 60               | 108              | -40                   | -44                   | -48                   |
| Biopsies                                      | 2266         | 1872 | 1857             | 1859             | 1862             | -394             | -15                   | -14                   | -10                   |
| Negative biopsies                             | 1046         | 909  | 884              | 883              | 883              | -137             | -25                   | -26                   | -26                   |
| Diagnosed cancers                             | 1220         | 964  | 973              | 976              | 978              | -256             | 9                     | 12                    | 16                    |
| Screen-detected cancers                       | 0            | 10   | 7                | 7                | 6                | 10               | -3                    | -3                    | -3                    |
| Overdiagnosed cancers                         | 0            | 3    | 2                | 2                | 2                | 3                | -1                    | -1                    | -1                    |
| Prostate cancer death                         | 474          | 409  | 412              | 412              | 414              | -64              | 2                     | 3                     | 4                     |

**S3 Table.** Predicted effects after age 70 for no screening, PSA screening and S3M screening at 4-year intervals for ages 55 to 69 years. Screening tests after the age of 70 are due to ongoing work-up originating in previous negative biopsies. The effects are presented as clinical events per 10,000 men and the four right most columns shows the differences between the scenarios.

<sup>a</sup> S3M as a reflex test between 1 and 10 ng/mL [3].

<sup>b</sup> S3M as a reflex test between 1.5 and 10 ng/mL as per clinical practice [2].

<sup>c</sup> S3M as a reflex test between 2 and 10 ng/mL.

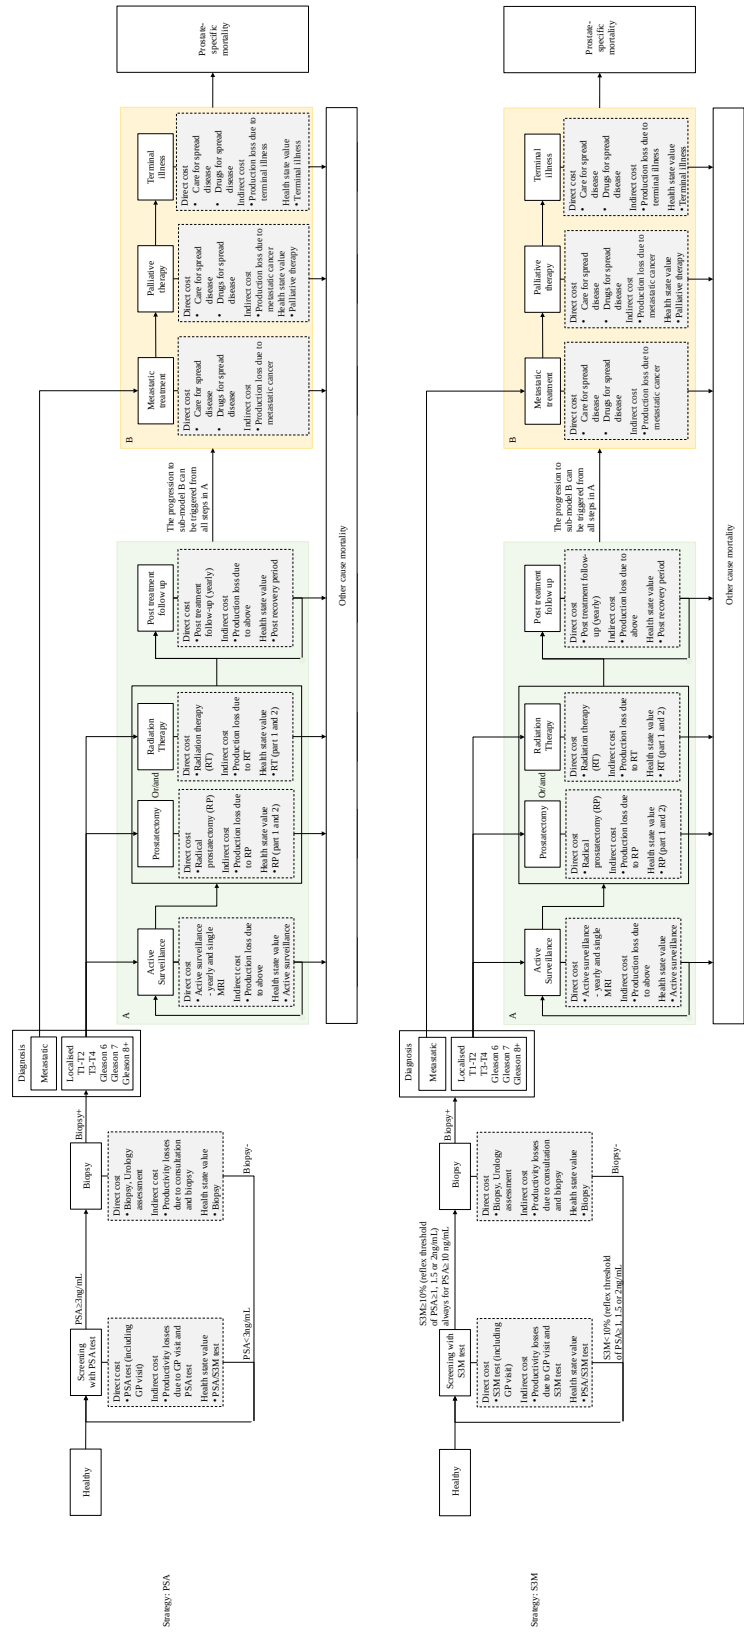

Sub-model A: Treatment for patients with localized prostate cancer  
 Sub-model B: Treatment for patients with metastatic prostate cancer: Palliative therapy and Terminal care.  
 GP: General Practitioner; MRI: Magnetic Resonance Imaging; PSA: Prostate-Specific Antigen;  
 RP: Radical Prostatectomy; RT: Radiation Therapy; SM: Surveillance.

**S3 Fig.** Detailed depiction of the health economic aspects of the model structure.



---

## References

1. Socialstyrelsen. Screening för prostatacancer med PSA- prov. Hälsoekonomisk analys. Stockholm: Socialstyrelsen; 2018. Available from: <https://www.socialstyrelsen.se/SiteCollectionDocuments/2018-2-13-halsoekonomisk-analys.pdf>.
2. Karolinska Universitetslaboratoriet. Prostatacancertestet Stockholm-3; 2018. <https://www.karolinska.se/KUL/Alla-anvisningar/Anvisning/10245>.
3. Grönberg H, Adolfsson J, Aly M, Nordström T, Wiklund P, Brandberg Y, et al. Prostate cancer screening in men aged 50–69 years (STHLM3): a prospective population-based diagnostic study. *The Lancet Oncology*. 2015;16(16):1667 – 1676. doi:[http://dx.doi.org/10.1016/S1470-2045\(15\)00361-7](http://dx.doi.org/10.1016/S1470-2045(15)00361-7).
